# Supplementary material for: Case report: ex vivo tumor organoid drug testing identifies therapeutic options for stage IV ovarian carcinoma
Source: PubMed Central journal article supplement (PMC10794297; doi:10.3389/fonc.2023.1267650), 2024-01-04
Supplement: DataSheet_1.pdf [file DataSheet_1.pdf]

## *Supplementary Material*

### **Case Report: *Ex vivo* tumor organoid drug testing identifies therapeutic options for stage IV ovarian carcinoma**

**Marwah Al-Aloosi<sup>1</sup>, Amanda M. Precht<sup>1</sup>, Payel Chatterjee<sup>1</sup>, Brady Bernard<sup>1,2</sup>, Christopher J. Kemp<sup>3</sup>, Rachele Rosati<sup>1</sup>, Robert L. Diaz<sup>1</sup>, Lauren R. Appleyard<sup>1</sup>, Shalini Pereira<sup>1</sup>, Alex Rajewski<sup>1</sup>, Amber McDonald<sup>4</sup>, Eva J. Gordon<sup>4\*</sup>, Carla Grandori<sup>1\*</sup>**

<sup>1</sup> SEngine Precision Medicine, Seattle, WA, United States

<sup>2</sup> Earle A. Chiles Research Institute, Providence Cancer Institute, Portland, OR, USA

<sup>3</sup> Division of Human Biology, Fred Hutchinson Cancer Center, Seattle, WA

<sup>4</sup> Private Health Management, Los Angeles, CA, United States

**\*Correspondence:**

Eva J. Gordon

[egordon@privatehealth.com](mailto:egordon@privatehealth.com)

Carla Grandori

[cgrandori@senginemedicine.com](mailto:cgrandori@senginemedicine.com)

## **1 Supplementary Methods**

### **1.1 The PARIS<sup>®</sup> test**

Oncologists order the PARIS<sup>®</sup> test by filling out a requisition form provided by SEngine Precision Medicine. Patients are contacted for an optional consent to the IRB research protocol established at SEngine to enable clinical research, the use of residual material for research, and authorization for medical records to enable clinical research. This patient gave authorization to SEngine Precision Medicine to obtain original medical data.

Organoids are established from surgical excisions, body fluids such as ascites, or biopsies following CLIA certified standard operating procedures. Once an organoid culture reaches a purity level of greater than 70%, they are subjected to drug screening. This patient's culture reached 70% purity after 7 days. A custom panel of 12 drugs was selected for the patient from a library of over 200 oncology agents validated for activity. The SEngine drug library includes FDA-approved and experimental oncology drugs, chemotherapeutics, hormone antagonists, and small-molecule inhibitors. The patient's organoid-based drug sensitivity was measured through a series of standard drug response metrics (IC<sub>50</sub> and area under the curve – AUC) as well as proprietary algorithms. Drugs receive an SPM score ranging from 15 to 1, with 15 being the most effective. Drugs that score below 9 are considered not active. A CLIA-certified test report with these results was sent to the oncologist. Additional background can be found in previous pre-clinical research papers (16,23-25).

## 1.2 Targeted sequencing

The known pathogenic *ESR1* mutation that was observed in the tissue biopsy was confirmed in the organoids with targeted sequencing with SNP genotyping (Genewiz). SNP ID rs1057519717 was used to confirm the adjacent mutation of *ESR1* Y537S.

## 2.1 Supplementary results

Supplementary Table 1. Summary of molecular testing performed.

| Molecular Test   | Date of Specimen Collection | Specimen Site  | Results                                                                                                                                                                                                | Genes tested                                                                                         |
|------------------|-----------------------------|----------------|--------------------------------------------------------------------------------------------------------------------------------------------------------------------------------------------------------|------------------------------------------------------------------------------------------------------|
| FoundationOne    | 7-21-2016                   | Omentum        | <i>CDKN2A</i> loss<br>Microsatellite stable<br>MMR proficient<br>Low TMB<br>PD-L1 Negative                                                                                                             | DNA sequences for 315 genes and rearrangements in 28 genes<br>(Full list in Suppl. Fig. 1)           |
| FoundationOne    | 10-20-2016                  | Omentum        | <i>CDKN2A</i> loss<br>Microsatellite stable<br>MMR proficient<br>Low TMB                                                                                                                               | DNA sequences for 315 genes and rearrangements in 28 genes<br>(Full list in Suppl. Fig. 1)           |
| Tempus xT        | 10-20-2016                  | Abdominal wall | Overexpression: <i>TP53</i> , <i>MET</i> , <i>PAX8</i> , and <i>MUC16</i> (CA125)<br>Underexpression: <i>PGR</i><br>PD-L1 negative<br>Low TMB<br>Microsatellite stable                                 | DNA sequences for 595 genes and full transcriptome RNA sequencing<br>(Full list in Suppl. Fig. 2)    |
| Tempus xT        | 10-24-2018                  | Right flank    | <i>ESR1</i> mutation (Y537S)<br>Overexpression: <i>TP53</i> , <i>MET</i> , <i>PAX8</i> , and <i>MUC16</i> (CA125)<br>Underexpression: <i>PGR</i><br>Low TMB<br>Microsatellite stable<br>PD-L1 negative | DNA sequences for 596 genes and full transcriptome RNA sequencing<br>(Full list in Suppl. Fig. 3)    |
| Caris MI Profile | 10-24-2018                  | Right flank    | <i>ESR1</i> mutation (Y537S)<br>ER-positive<br>PR-negative<br>Low TMB<br>Microsatellite stable<br>MMR proficient<br>PD-L1 negative                                                                     | DNA sequences for 163 genes and copy number alterations for 39 genes<br>(Full list in Suppl. Fig. 4) |

ER, estrogen receptor; MMR, mismatch repair; PR, progesterone receptor; TMB, tumor mutational burden.

## Supplementary Figure 1. FoundationOne Gene List

### GENES ASSAYED IN FOUNDATIONONE

FoundationOne is designed to include all genes known to be somatically altered in human solid tumors that are validated targets for therapy, either approved or in clinical trials, and/or that are unambiguous drivers of oncogenesis based on current knowledge. The current assay interrogates 315 genes as well as introns of 28 genes involved in rearrangements. The assay will be updated periodically to reflect new knowledge about cancer biology.

#### DNA Gene List: Entire Coding Sequence for the Detection of Base Substitutions, Insertion/Deletions, and Copy Number Alterations

|        |                 |             |               |              |                      |          |                 |         |                 |
|--------|-----------------|-------------|---------------|--------------|----------------------|----------|-----------------|---------|-----------------|
| ABL1   | ABL2            | ACVR1B      | AKT1          | AKT2         | AKT3                 | ALK      | AMER1 (FAM123B) | APC     | AR              |
| ARAF   | ARFRP1          | ARID1A      | ARID1B        | ARID2        | ASXL1                | ATM      | ATR             | ATRX    | AURKA           |
| AURKB  | AXIN1           | AXL         | BAP1          | BAR1         | BCL2                 | BCL2L1   | BCL2L2          | BCL6    | BCOR            |
| BCORL1 | BLM             | BRAF        | BRCA1         | BRCA2        | BRD4                 | BRIP1    | BTG1            | BTK     | C11orf93 (EMSY) |
| CARD11 | CBFB            | CBL         | CCND1         | CCND2        | CCND3                | CCNE1    | CD274           | CD79A   | CD79B           |
| CDC73  | CDH1            | CDK12       | CDK4          | CDK6         | CDK8                 | CDKN1A   | CDKN1B          | CDKN2A  | CDKN2B          |
| CDKN2C | CEBPA           | CHD2        | CHD4          | CHEK1        | CHEK2                | CIC      | CREBBP          | CRKL    | CRLF2           |
| CSF1R  | CTCF            | CTNNA1      | CTNNB1        | CUL3         | CYLD                 | DAXX     | DOR2            | DICER1  | DNMT3A          |
| DOT1L  | EGFR            | EP300       | EPHA3         | EPHA5        | EPHA7                | EPHB1    | ERBB2           | ERBB3   | ERBB4           |
| ERG    | ERRF1           | ESR1        | EZH2          | FAM43C       | FANCA                | FANCC    | FANCD2          | FANCE   | FANCF           |
| FANCG  | FANCL           | FAS         | FAT1          | FBXW7        | FGF10                | FGF14    | FGF19           | FGF23   | FGF3            |
| FGF4   | FGF6            | FGFR1       | FGFR2         | FGFR3        | FGFR4                | FH       | FLCN            | FLT1    | FLT3            |
| FLT4   | FOXL2           | FOXP1       | FRS2          | FUBP1        | GABRA6               | GATA1    | GATA2           | GATA3   | GATA4           |
| GATA6  | GID4 (C17orf99) | GLI1        | GNA11         | GNA13        | GNAQ                 | GNAS     | GPR124          | GRIN2A  | GRM3            |
| GSK3B  | H3F3A           | HGF         | HNF1A         | HRAS         | HSD3B1               | HSP90AA1 | IDH1            | IDH2    | IGF1R           |
| IGF2   | IKBKE           | IKZF1       | IL7R          | INHBA        | INPP4B               | IRF2     | IRF4            | IRS2    | JAK1            |
| JAK2   | JAK3            | JUN         | KAT5A (MYST3) | KDM5A        | KDM5C                | KDM6A    | KDR             | KEAP1   | KEL             |
| KIT    | KLHL6           | KMT2A (MLL) | KMT2C (MLL3)  | KMT2D (MLL2) | KRAS                 | LMO1     | LRP1B           | LYN     | LZTR1           |
| MAGI2  | MAP2K1          | MAP2K2      | MAP2K4        | MAP3K1       | MCL1                 | MDM2     | MDM4            | MED12   | MEF2B           |
| MEN1   | MET             | MITF        | MLH1          | MPL          | MRE11A               | MSH2     | MSH6            | MTOR    | MUTYH           |
| MYC    | MYCL (MYCL1)    | MYCN        | MYD88         | NF1          | NF2                  | NFE2L2   | NFKBIA          | NKG2-1  | NOTCH1          |
| NOTCH2 | NOTCH3          | NPM1        | NRAS          | NSD1         | NTRK1                | NTRK2    | NTRK3           | NUP93   | PAK3            |
| PALB2  | PARK2           | PAX5        | PBRM1         | POCD1LG2     | POGFR4               | PDGFRB   | PDK1            | PIK3C2B | PIK3CA          |
| PIK3CB | PIK3CG          | PIK3R1      | PIK3R2        | PLCG2        | PMS2                 | POLD1    | POLE            | PPP2R1A | PRDM1           |
| PREX2  | PRKAR1A         | PRKCI       | PRKDC         | PRSS8        | PTCH1                | PTEN     | PTPN11          | QKI     | RAC1            |
| RAD50  | RAD51           | RAF1        | RANBP2        | RARA         | RB1                  | RBM10    | RET             | RICTOR  | RNF43           |
| ROS1   | RPTOR           | RUNX1       | RUNX1T1       | SDHA         | SDHB                 | SDHC     | SDHD            | SETD2   | SF3B1           |
| SLIT2  | SMAD2           | SMAD3       | SMAD4         | SMARCA4      | SMARCB1              | SMD      | SNCAIP          | SOC3    | SOX10           |
| SOX2   | SOX9            | SPEN        | SPOP          | SPTA1        | TERT (promoter only) | TET2     | TGFB2           | TNFAIP3 | TNFRSF14        |
| SUFU   | SYK             | TAF1        | TBX3          | TERC         | TSHR                 | U2AF1    | VEGFA           | VHL     | WISP3           |
| TOP1   | TOP2A           | TP53        | TSC1          | TSC2         |                      |          |                 |         |                 |
| WT1    | XPO1            | ZBTB2       | ZNF217        | ZNF703       |                      |          |                 |         |                 |

#### DNA Gene List: For the Detection of Select Rearrangements

|       |       |        |       |       |       |      |         |      |        |
|-------|-------|--------|-------|-------|-------|------|---------|------|--------|
| ALK   | BCL2  | BCR    | BRAF  | BRCA1 | BRCA2 | BRD4 | EGFR    | ETV1 | ETV4   |
| ETV5  | ETV6  | FGFR1  | FGFR2 | FGFR3 | KIT   | MSH2 | MYB     | MYC  | NOTCH2 |
| NTRK1 | NTRK2 | PDGFRA | RAF1  | RARA  | RET   | ROS1 | TMPRSS2 |      |        |

#### Additional Assays: For the Detection of Select Cancer Biomarkers

Microsatellite status  
Tumor Mutation Burden

Supplementary Figure 2. Tempus xT Gene List from October 2016 Test.

**Heme Related Genes**

|          |       |       |       |        |         |        |       |       |        |         |         |          |       |
|----------|-------|-------|-------|--------|---------|--------|-------|-------|--------|---------|---------|----------|-------|
| ARHGAP26 | BIRC3 | CITTA | DDX3X | ETV6   | HDAC1   | LEF1   | MAPK1 | NUP98 | POT1   | SMARCA1 | STAT5B  | TCL3A    | WHSC1 |
| BCL10    | CBLB  | CKS1B | DNM2  | FBXO11 | HDAC4   | MAF    | MEB1  | P2RY8 | RAD21  | SMC1A   | STAT6   | TNFRSF17 | ZRSR2 |
| BCL11B   | CBL   | CSF3R | EBF1  | FHIT   | HST1H4E | MAFB   | MK167 | PCBP1 | RHOA   | SMC3    | SUZ12   | TP63     |       |
| BCL3A    | CD22  | CLX1  | ECT2L | FOXO1  | HST1H3B | MALT1  | NCOR2 | PHF6  | SETBP1 | SRSF2   | TBL1XR1 | TRAF3    |       |
| BCR      | CD70  | CXCR4 | EPOR  | FOXO3  | KMT2B   | MAP3K7 | NTSC2 | PIM1  | SGK1   | STAT5A  | TCF3    | TUSC3    |       |

**Both Heme and Solid Tumor Related Genes**

|       |        |        |        |        |        |          |       |        |        |          |         |         |          |
|-------|--------|--------|--------|--------|--------|----------|-------|--------|--------|----------|---------|---------|----------|
| ABCB1 | AURKB  | CARD11 | CDKN2B | EGFR   | FANCD2 | FLT1     | IDH1  | KEAP1  | MITF   | NOTCH1   | PIK3R2  | RUNX1   | STAT3    |
| ABCC3 | AXIN1  | CBFB   | CDKN2C | EP300  | FANCE  | FLT3     | IDH2  | KIT    | MLH1   | NOTCH2   | PLCG2   | SDHA    | STAT4    |
| ABL1  | AXL    | CBL    | CEBPA  | EPHA7  | FANCF  | FLT4     | IKBKE | KLHL6  | MPL    | NPM1     | PPP2R2A | SDHB    | STK11    |
| AKT1  | B2M    | CCND1  | CHD2   | EPHB1  | FANCG  | FOXL2    | IKZF1 | KMT2A  | MRE11A | NRAS     | PRDM1   | SDHC    | SUFU     |
| AKT2  | BAP1   | CCND2  | CHEK1  | ERBB2  | FANCL  | FOXP1    | IL7R  | KMT2C  | MSH2   | NTRK1    | PRKARIA | SDHD    | TAF1     |
| AKT3  | BAR1   | CCND3  | CHEK2  | ERBB3  | FAS    | FRS2     | INP4B | KRAS   | MSH8   | NTRK2    | PTCH1   | SETD2   | TET2     |
| ALK   | BCL2   | CCNE1  | CIC    | ERBB4  | FBXW7  | GATA1    | IRF1  | LRP1B  | MSH6   | NTRK3    | PTEN    | SF3B1   | TGFBR2   |
| AMER1 | BCL6   | CD274  | CREBBP | ERG    | FGF10  | GATA2    | IRF4  | MAP2K1 | MTOR   | PALB2    | PTPN11  | SMAD2   | TMPPRSS2 |
| APC   | BCOR   | CD70A  | CRKL   | ESR1   | FGF14  | GATA3    | IRS2  | MAP2K2 | MUTYH  | PAWS     | RAD50   | SMAD3   | TNFAIP3  |
| AR    | BCORL1 | CD70B  | CRLF2  | ETS1   | FGF23  | GNA11    | JAK1  | MAP2K4 | MYC    | PBRM1    | RAD51   | SMARCA4 | TNFRSF14 |
| ARAF  | BLM    | CDC73  | CSF1R  | ETV1   | FGF3   | GNA3     | JAK2  | MAP3K1 | MYCL   | PDCD1    | RAF1    | SMARCB1 | TOP1     |
| ARD1A | BRAF   | CDH1   | CTCF   | ETV4   | FGF4   | GNAQ     | JAK3  | MCL1   | MYCN   | PDCD1LG2 | RARA    | SMO     | TP53     |
| ARD2  | BRCAT  | CDK12  | CTNNA1 | ETV5   | FGF6   | GNA5     | JUN   | MDM2   | MYD88  | PDGFRA   | RB1     | SOCS1   | TSC1     |
| ASXL1 | BRCAC2 | CDK4   | CTNNA1 | EWSR1  | FGFR1  | GRIN2A   | KAT5A | MDM4   | NF1    | PDGFRB   | RET     | SOX10   | TSC2     |
| ATM   | BRD4   | CDK6   | DAKK   | EZH2   | FGFR2  | HGF      | KDM5A | MED12  | NF2    | PKD1     | RICTOR  | SOX2    | TSHR     |
| ATR   | BSD1   | CDK8   | DDR2   | FAM48C | FGFR3  | HNF1A    | KDM5C | MEF2B  | NFE2L2 | PIK3CA   | RNF43   | SPEN    | U2AF1    |
| ATRX  | BTX    | CDKN1B | DNMT3A | FANCA  | FGFR4  | HRAS     | KDM6A | MEN1   | NFKBIA | PIK3CG   | RO51    | SPOP    | VHL      |
| AURKA | CALR   | CDKN2A | DOT1L  | FANCC  | FLCN   | HSP90AA1 | KDR   | MET    | NKX2-1 | PIK3R1   | RPTOR   | SRC     | WT1      |
|       |        |        |        |        |        |          |       |        |        |          |         | STAG2   | XPO1     |

**Solid Tumor Related Genes**

|          |         |         |         |         |          |        |        |        |          |         |         |         |        |
|----------|---------|---------|---------|---------|----------|--------|--------|--------|----------|---------|---------|---------|--------|
| ABL2     | Ctla65  | CYP2A5  | ERCC5   | FNTB    | HIF1A    | HLA-E  | IRF2   | MTHFR  | POPK1    | PTCH2   | RSF1    | TAP1    | WRN    |
| ACTA2    | C3orf70 | DDI2    | ERCC6   | FOXK1   | HST1H4E  | HLA-F  | ITPKB  | MTRR   | PHOX2B   | PTPN3   | RUNX1T1 | TAP2    | XPA    |
| ACVR2B   | C8orf34 | DICER1  | ERDF1   | FOXQ1   | HLA-A    | HLA-G  | KEL    | MYB    | PIAS4    | PTPN22  | QSOX    | TBC1D12 | XPC    |
| AJUBA    | CASP8   | DRC2    | ETS2    | FLBBP1  | HLA-B    | HNF1B  | KIF1B  | MW11   | PIK3C2B  | PTPRD   | SCG5    | TBX3    | XRCC1  |
| APOB     | CASR    | Drs3    | FAM175A | G6PD    | HLA-C    | HDXB13 | KLLN   | NBN    | PIK3CB   | QKI     | SDHAF2  | TCF7L2  | XRCC2  |
| ARHGAP35 | CBR3    | Drs3L2  | FANCB   | GALNT12 | HLA-DMA  | HSPH1  | KMT2D  | NCOR1  | PIK3CD   | RAC1    | SEC23B  | TIGIT   | XRCC3  |
| ARD1B    | CCDC6   | DKC1    | FANCI   | GATA4   | HLA-DMB  | IDO1   | LASS   | NHR2   | PML      | RAD51B  | SEMA3C  | TMEM127 | YEATS4 |
| ARD5B    | CD19    | DPYD    | FANCM   | GATA6   | HLA-DOA  | IFIT1  | LDLR   | NOP10  | PMS1     | RAD51C  | SH3BP3  | TMEM173 | ZFN3   |
| ASNS     | CD40    | DYNC2H1 | FAT1    | GEN1    | HLA-DOB  | IFIT2  | LMNA   | NOTCH3 | PMS2     | RAD51D  | SLC26A3 | TNF     | ZNF217 |
| ATIC     | CDKN1A  | EGF     | FCGR2A  | GLI1    | HLA-DPA1 | IFIT3  | LMO1   | NQO1   | POLD1    | RAD54L  | SLC40A2 | TNFRSF9 | ZNF471 |
| ATP1B    | CDKN1C  | EGLN1   | FCGR3A  | GPC3    | HLA-DPB1 | IFNAR1 | LYN    | NRG1   | POLE     | RANBP2  | SLIT2   | TOP2A   | ZNF620 |
| AXIN2    | CEP57   | ELF3    | FDP5    | GPS2    | HLA-DPB2 | IFNAR2 | LZTR1  | NSD1   | POLH     | RASA1   | SLX4    | TPM1    | ZNF750 |
| BCL1L1   | CFTR    | ENG     | FGF1    | GREM1   | HLA-DQA1 | IFNGR1 | MAD2L2 | NTHL1  | POLQF2   | RBM10   | SMAD3   | TPMT    | ZNF93  |
| BCL2L1   | CHD4    | EPCAM   | FGF2    | GRM3    | HLA-DQA2 | IFNGR2 | MAX    | NUMT15 | PPP1R15A | RECQL4  | SMARCE1 | TNFSF5  |        |
| BCLAF1   | CTC1    | EPHA2   | FGF5    | GSTP1   | HLA-DQB1 | IFNL3  | MC1R   | PAK1   | PPP2R2A  | RINT1   | SOD2    | UBE2T   |        |
| BMP2R1A  | CTLA4   | EPHB2   | FGF7    | H19     | HLA-DQB2 | IL13RA | MGM1   | PALLD  | PPP6C    | RIT1    | SOD3    | UGT1A1  |        |
| BTG1     | CTRC    | ERCC1   | FGF8    | HJF3A   | HLA-DRA  | IL5    | MLH3   | PARK2  | PRCC     | RNF139  | SPINK1  | UGT1A9  |        |
| BUB1B    | CYLD    | ERCC2   | FGF9    | HAS3    | HLA-DRE1 | IL2RA  | MLLT3  | PAK3   | PDEX2    | RPL5    | SPRED1  | UMPS    |        |
| C10orf54 | CYP11B1 | ERCC3   | FH1     | HAVCR2  | HLA-DRE5 | IL8R   | MS4R1  | PAK7   | PRSS1    | RPS15   | SYK     | VEGFA   |        |
| C1orf90  | CYP2D6  | ERCC4   | FLG     | HDAC2   | HLA-DRE6 | ING1   | MTAP   | PAK8   | PRSS2    | RPS6KB1 | TANC1   | WEE1    |        |

**Gene Rearrangements by DNA Sequencing**

|      |      |       |      |       |        |          |
|------|------|-------|------|-------|--------|----------|
| ABL1 | BRAF | EWSR1 | MYB  | NTRK1 | PDGFRA | RET      |
| ALK  | EGFR | FGFR2 | MYC  | NTRK3 | PML    | ROS1     |
| BCR  | ETV6 | FGFR3 | NRG1 | PAK8  | RARA   | TMPPRSS2 |

\*MSI is reported for tumor/normal matched samples only.

In addition to reporting on somatic variants, when a normal sample is provided, Tempus reports germline incidental findings on a limited set of variants within genes selected based on recommendations from the American College of Medical Genetics (ACMG) and published literature on inherited cancer syndromes. Patients always have the option to opt out of receiving this information.

Supplementary Figure 3. Tempus xT Gene List from October 2018 Test.

**Heme Related Genes**

|          |       |       |       |       |         |        |       |       |        |         |         |          |       |
|----------|-------|-------|-------|-------|---------|--------|-------|-------|--------|---------|---------|----------|-------|
| ARHGAP26 | BIRC3 | CITA  | DDX3X | ETV6  | HDAC1   | LEF1   | MAPK1 | NUP98 | POT1   | SMARCA1 | STAT5B  | TCL3A    | WHSC1 |
| BCL10    | CBLB  | CK51B | DNM2  | FBXO1 | HDAC4   | MAF    | MB1   | P2RY8 | RAD21  | SMC1A   | STAT6   | TNFRSF17 | ZRSR2 |
| BCL11B   | CBLC  | CSF3R | EBF1  | FH1T  | HST1H1E | MAFB   | MK667 | PCBP1 | RHOA   | SMC3    | SUZ12   | TP63     |       |
| BCL3A    | CD22  | CLK1  | ECT2L | FOXO1 | HST1H3B | MALT1  | NCOA2 | PHF6  | SETBP1 | SRSF2   | TBL1XR1 | TRAF3    |       |
| BCR      | CD70  | CXCR4 | EPOR  | FOXO3 | KMT2B   | MAP3K7 | NTSC2 | PIM1  | SGK1   | STAT5A  | TCF3    | TUSC3    |       |

**Both Heme and Solid Tumor Related Genes**

|        |        |        |        |        |        |          |        |        |        |          |         |         |          |
|--------|--------|--------|--------|--------|--------|----------|--------|--------|--------|----------|---------|---------|----------|
| ABCB1  | AURKB  | CARD11 | CDKN2B | EGFR   | FANCD2 | FLT1     | IDH1   | KEAP1  | MITF   | NOTCH1   | PIK3R2  | SDHA    | STAT4    |
| ABCC3  | AXIN1  | CBFB   | CDKN2C | EP300  | FANCE  | FLT3     | IDH2   | KIT    | MLH1   | NOTCH2   | PLCG2   | SDHB    | STAT1    |
| ABL1   | AXL    | CBL    | CEBPA  | EPHA2  | FANCF  | FLT4     | IKBKE  | NLH1L6 | MPL    | NPM1     | PPP2R1A | SDHC    | SULFU    |
| AKT1   | B2M    | CCND1  | CHD2   | EPHB1  | FANCG  | FOXJ2    | KCF1   | KMT2A  | MRE11A | NRAS     | PRDM1   | SDHD    | TAF1     |
| AKT2   | BAD1   | CCND2  | CHEK1  | ERBB2  | FANCL  | FOXP1    | ILIR   | KMT2C  | MSH2   | NTRK1    | PRKARIA | SETD2   | TET2     |
| AKT3   | BARD1  | CCND3  | CHEK2  | ERBB3  | FAS    | FRS2     | INPP4B | KRAS   | MSH3   | NTRK2    | PTCH1   | SF3B1   | TER1*    |
| ALK    | BCL2   | CCNE1  | CIC    | ERBB4  | FBXW7  | GATA1    | IRF1   | LRR1B  | MSH6   | NTRK3    | PTEN    | SMAD2   | TGFB2*   |
| AMEE1  | BCL6   | CD274  | CREBBP | ERG    | FGF10  | GATA2    | IRF4   | MAP2K1 | MTOR   | PALB2    | PTPN01  | SMAD4   | TMPRSS2  |
| ADC    | BCOR   | CD79A  | CRKL   | ESR1   | FGF4   | GATA3    | IRS2   | MAP2K2 | MULTYH | PAK5     | RAD50   | SMARCA4 | TNFAIP3  |
| AR     | BCORL1 | CD79B  | CRLF2  | ETS1   | FGF23  | GNA01    | JAK1   | MAP2K4 | MYC    | PBRM1    | RAD51   | SMARCB1 | TNFRSF14 |
| ARAF   | BLM    | CDC73  | CSF1R  | ETV1   | FGF3   | GNAQ3    | JAK2   | MAP3K1 | MYCL   | PDCD1    | RAF1    | SMO     | TOP1     |
| ARID1A | BRAF   | CDH1   | CTCF   | ETV4   | FGF4   | GNAQ     | JAK3   | MCL1   | MYCN   | PDCD1LG2 | RARA    | SOC31   | TP53     |
| ARID2  | BRCAC1 | CDK12  | CTNNA4 | ETV5   | FGF6   | GNA5     | JUN    | MDM2   | MYD88  | PDGFRA   | RBI     | SOX10   | TSC1     |
| ASXL1  | BRCAC2 | CDK4   | CTNNA1 | EWSR1  | FGFR1  | GRII2A   | KAT5A  | MDM4   | NF1    | PDGFRB   | RET     | SOX2    | TSC2     |
| ATM    | BRD4   | CDK6   | DAXX   | E2H2   | FGFR2  | HGF      | KDM5A  | MED12  | NF2    | PDK1     | RICTOR  | SPEN    | TSHR     |
| ATR    | BRIP1  | CDK8   | DDR2   | FAM46C | FGFR3  | HNF1A    | KDM5C  | MEF2B  | NFE2L2 | PKNOA    | RNF43   | SPPO    | UZAF1    |
| ATRX   | BTX    | CDKN1B | DNMT3A | FANCA  | FGFR4  | HRAS     | KDM6A  | MEN1   | NFKBIA | PKNOG    | ROSI    | SRC     | VHL      |
| AURKA  | CALR   | CDKN2A | DOT1L  | FANCC  | FLCN   | HSP90AA1 | KDR    | MET    | NKX2-1 | PKNO1    | RPTOR   | STAG2   | WT1      |
|        |        |        |        |        |        |          |        |        |        |          | RUNX1   | STAT3   | XP01     |

**Solid Tumor Related Genes**

|          |          |         |         |         |          |        |        |        |          |         |         |         |        |
|----------|----------|---------|---------|---------|----------|--------|--------|--------|----------|---------|---------|---------|--------|
| ABL2     | C11orf90 | CYP2D6  | ERCC4   | FNTB    | HIF1A    | HLA-E  | IQF2   | MTHFR  | POPK1    | PTCH2   | RSF1    | TAP1    | WEE1   |
| ACTA2    | C11orf85 | CYP3A5  | ERCC5   | FOXA1   | HIST1H4E | HLA-F  | ITPKB  | MTRR   | PHOX2B   | PTPN13  | RUNX1T1 | TAP2    | WRN    |
| ACVR1B   | C3orf70  | DDI2    | ERCC6   | FOXO1   | HLA-A    | HLA-G  | KEL    | MYB    | PIAS4    | PTPN22  | RORA    | TBC1D12 | XPA    |
| AJUBA    | C8orf34  | DKC1    | ERBB1   | FUBP1   | HLA-B    | HNF1B  | KIF1B  | MYH11  | PIK3CB   | PTPRD   | SCG5    | TBX3    | XPC    |
| APLN1R   | CASP8    | DIRC2   | ETS2    | G6PD    | HLA-C    | HOKB13 | KLLN   | NBN    | PIK3CB   | QKI     | SOHAF2  | TCEB1   | XRCC1  |
| APOB     | CASR     | DYS3    | FAM175A | GALNT12 | HLA-DMA  | HSPH1  | KMT2D  | NCOA3  | PIK3CD   | RAC1    | SEC23B  | TCF7L2  | XRCC2  |
| ARHGAP35 | CBR3     | DIS3L2  | FANCB   | GATA4   | HLA-DMB  | IDO1   | LAG3   | NHP2   | PML      | RAD51B  | SEMA3C  | TIGIT   | XRCC3  |
| ARID1B   | CCDC6    | DKC1    | FANCI   | GATA6   | HLA-DQA  | IFI1   | LDLR   | NOP10  | PMS1     | RAD51C  | SH2B3   | TMEM127 | YEAT54 |
| ARID5B   | CD19     | DPYD    | FANCM   | GEN1    | HLA-DOB  | IFIT2  | LMNA   | NOTCH3 | PMS2     | RAD51D  | SLC26A3 | TMEM175 | ZFH3   |
| ASNS     | CD40     | DYNC2H1 | FAT1    | GLI1    | HLA-DPA1 | IFIT3  | LMO1   | NQO1   | POLD1    | RAD54L  | SLC40A2 | TNF     | ZNF217 |
| ATIC     | CDKN1A   | EGF     | FCGR2A  | GPC3    | HLA-DPB1 | IFNA2  | LYN    | NRG1   | POLE     | RANBP2  | SLIT2   | TNFRSF9 | ZNF471 |
| ATP7B    | CDKN1C   | EGLN1   | FCGR3A  | GPS2    | HLA-DPB2 | IFNA2  | LZTR1  | NSD1   | POLH     | RASA1   | SLX4    | TOP2A   | ZNF630 |
| AXIN2    | CEP57    | ELF3    | FDPS    | GREM1   | HLA-DQA1 | IFNGR1 | MAD2L2 | NTHL1  | POLQ2F2  | RBM10   | SMAD3   | TPM1    | ZNF750 |
| BCL2L1   | CFTR     | ENG     | FGF1    | GRM3    | HLA-DQA2 | IFNGR2 | MAX    | NUDT15 | PPARG    | RECQL4  | SMARCE1 | TPM2    | ZNF93  |
| BCL2L11  | CHD4     | EPCAM   | FGF2    | GSTP1   | HLA-DQB1 | IFNL3  | MC1R   | PAK1   | PPP1R15A | RINT1   | SOD2    | TYMS    |        |
| BCLAF1   | CTC1     | EPHA2   | FGF5    | H19     | HLA-DQB2 | IL10RA | MGMT   | PALLD  | PPP2R2A  | RIT1    | SOX9    | UBE2T   |        |
| BMP90A   | CTLA4    | EPHB2   | FGF7    | H3F3A   | HLA-DGA  | IL5    | MLH3   | PARK2  | PPP6C    | RNF139  | SPINK1  | UGT1A1  |        |
| BTG1     | CTRC     | ERCC1   | FGF8    | HAS3    | HLA-DRB1 | IL2RA  | MLL3   | PAX3   | PRCC     | RPL5    | SPRED1  | UGT1A9  |        |
| BUB1B    | CYLD     | ERCC2   | FGF9    | HAVCR2  | HLA-DRB5 | IL6R   | MS4A1  | PAX7   | PREX2    | RPS15   | SYK     | UMPS    |        |
| C10orf54 | CYP11B1  | ERCC3   | FH      | HDAC2   | HLA-DRB6 | ING1   | MTAP   | PAX8   | DRS1     | RPS6KB1 | TANC1   | VEGFA   |        |

**Gene Rearrangements by DNA Sequencing**

|      |      |       |      |       |       |         |
|------|------|-------|------|-------|-------|---------|
| ABL1 | BRAF | EWSR1 | MYB  | NTRK1 | POGFR | RET     |
| ALK  | EGFR | FGFR2 | MYC  | NTRK3 | PML   | ROS1    |
| BCR  | ETV6 | FGFR3 | NRG1 | PAX8  | RARA  | TMPRSS2 |

\* Includes promoter region

In addition to reporting on somatic variants, when a normal sample is provided, Tempus reports germline incidental findings on a limited set of variants within genes selected based on recommendations from the American College of Medical Genetics (ACMG) and published literature on inherited cancer syndromes. Patients always have the option to opt out of receiving this information.

Supplementary Figure 4. Caris MI Profile gene list.

| GENES TESTED WITHOUT POINT MUTATIONS OR INDELS BY NGS |          |        |         |         |         |        |                     |                  |        |         |        |
|-------------------------------------------------------|----------|--------|---------|---------|---------|--------|---------------------|------------------|--------|---------|--------|
| ABL1                                                  | AKT1     | ALK    | AMER1   | APC     | AR      | ARAF   | ARID2               | ATM              | ATR    | BAP1    | BARD1  |
| BCOR                                                  | BLM      | BMPR1A | BRAF    | BRCA1   | BRCA2   | BRIP1  | CARD11              | CCND1            | CCND2  | CCND3   | CD79B  |
| CDC73                                                 | CDH1     | CDK12  | CDK4    | CDK6    | CDKN1B  | CDKN2A | CHEK1               | CHEK2            | CIC    | CREBBP  | CSF1R  |
| CTNNB1                                                | CYLD     | DDR2   | DICER1  | DNMT3A  | EGFR    | EP300  | ERBB2<br>(Her2/Neu) | ERBB3            | ERBB4  | ERCC2   | EZH2   |
| FANCA                                                 | FANCC    | FANCD2 | FANCE   | FANCF   | FANCG   | FANCL  | FBXW7               | FGFR1            | FGFR2  | FGFR3   | FGFR4  |
| FH                                                    | FLCN     | FLT1   | FLT3    | FOXL2   | FUBP1   | GATA3  | GNA11               | GNA13            | GNAQ   | GNAS    | H3F3A  |
| H3F3B                                                 | HIST1H3B | HNF1A  | HRAS    | IDH1    | IDH2    | IRF4   | JAK1                | JAK2             | JAK3   | KDM5C   | KDM6A  |
| KDR<br>(VEGFR2)                                       | KIT      | KMT2A  | KMT2C   | KMT2D   | KRAS    | LCK    | MAP2K1<br>(MEK1)    | MAP2K2<br>(MEK2) | MAX    | MEN1    | MET    |
| MITF                                                  | MLH1     | MPL    | MRE11   | MSH2    | MSH6    | MTOR   | MUTYH               | MYCN             | MYD88  | NBN     | NF1    |
| NF2                                                   | NPM1     | NRAS   | NSD1    | NTRK1   | NTRK2   | NTRK3  | PALB2               | PBRM1            | PDGFRA | PDGFRB  | PHOX2B |
| PIK3CA                                                | PIK3R1   | PIM1   | PMS1    | PMS2    | POLE    | POT1   | PPARG               | PPP2R1A          | PRDM1  | PRKAR1A | PRKDC  |
| PTEN                                                  | PTPN11   | RAF1   | RB1     | RET     | RNF43   | ROS1   | SDHAF2              | SDHB             | SDHC   | SDHD    | SETD2  |
| SF3B1                                                 | SMAD2    | SMAD4  | SMARCA4 | SMARCB1 | SMARCE1 | SMO    | SPOP                | SRC              | STK11  | SUFU    | TERT   |
| TP53                                                  | TSC1     | TSC2   | U2AF1   | VHL     | WRN     | WT1    |                     |                  |        |         |        |

| GENES TESTED WITHOUT COPY NUMBER ALTERATIONS (AMPLIFICATIONS) BY NGS |                 |                  |       |                     |       |       |                  |        |       |       |        |
|----------------------------------------------------------------------|-----------------|------------------|-------|---------------------|-------|-------|------------------|--------|-------|-------|--------|
| AKT2                                                                 | ALK             | ARID1A           | AURKB | CCND1               | CCND3 | CCNE1 | CD274<br>(PD-L1) | CDK4   | CDK6  | CDK8  | CDKN2A |
| CREBBP                                                               | CRKL            | EGFR             | EP300 | ERBB2<br>(Her2/Neu) | EZH2  | FGF10 | FGF3             | FGF4   | FGFR1 | FGFR2 | FGFR3  |
| GATA3                                                                | KDR<br>(VEGFR2) | MAP2K1<br>(MEK1) | MCL1  | MDM2                | MET   | MYC   | NF2              | NFKBIA | NTRK1 | RB1   | RICTOR |
| ROS1                                                                 | TOP1            | WT1              |       |                     |       |       |                  |        |       |       |        |

Supplementary Table 2. All drug results from the PARIS<sup>®</sup> test.

\*Sorafenib was not reported because the curve had poor GOF. GOF, goodness of fit; SPM, SEngine Precision Medicine score.

| Drug            | Target                               | Cmax       | Inhibition at Cmax | IC50        | GOF      | AUC      | SPM |
|-----------------|--------------------------------------|------------|--------------------|-------------|----------|----------|-----|
| Ceritinib       | ALK, IGF-1R, ROS1                    | 0.00000143 | 91                 | 1.E-06      | 0.939834 | 0.463708 | 14  |
| Lapatinib       | HER2                                 | 0.00000404 | 73                 | 1.E-06      | 0.978372 | 0.546801 | 13  |
| Neratinib       | EGFR, HER1, HER2, HER4               | 2.14E-07   | 53                 | 9.E-08      | 0.392985 | 0.432102 | 12  |
| Fulvestrant     | selective estrogen receptor degrader | 2.08E-08   | NA                 | Not Reached | 0.459806 | 0.766484 | 12  |
| Sorafenib       | VEGFR, PDGFR, RAF                    | 0.0000211  | NA                 | Not Reached | 0.396155 | 0.876004 | 11* |
| Everolimus      | mTORC1                               | 3.86E-08   | 35                 | 8.E-06      | 0.728675 | 0.632184 | 10  |
| Crizotinib      | ALK, ROS1, MET                       | 9.48E-07   | 18                 | 6.E-06      | 0.907276 | 0.741848 | 9   |
| Enzalutamide    | androgen                             | 0.0000357  | NA                 | Not Reached | 0.995386 | 0.985087 | 9   |
| Cobimetinib     | MEK                                  | 5.14E-07   | 52                 | 4.E-07      | 0.862446 | 0.562029 | 6   |
| Palbociclib HCl | CDK4, CDK6                           | 3.08E-07   | 9                  | 9.E-06      | 0.813818 | 0.890205 | 5   |
